# Supplementary material for: Oral Health Knowledge, Attitude, and Practices among Parents of Pre-school Children in Damascus, Syria: Cross-Sectional Study
Source: Research Square preprint supplement (doi:10.21203/rs.3.rs-8498793/v1), 2026-02-10
Supplement: Supplementary file 1 [file 484afa894a4245acaed4938e.docx]

Table 6. A Paired Samples T-test to study the significance of the differences in the values ​​of the retention force (in Newtons) between the five studied time periods according to the type of attachment and the type of cap studied.

| Group | Compare between two periods: | Mean difference | F Value | P value | Sig. |
| --- | --- | --- | --- | --- | --- |
| Group I | After 1 month – initial stage | -2.62 | -2.735 | 0.052 | NO |
| After 6 months – initial stage | -6.68 | -6.391 | 0.003 | YES |
| After 1 year – initial stage | -9.92 | -7.556 | 0.002 | YES |
| After 2 years – initial stage | -14.94 | -12.851 | 0.000 | YES |
| After 6 months – after 1 month | -4.06 | -4.793 | 0.009 | YES |
| After 1 year – after 1 month | -7.30 | -9.703 | 0.001 | YES |
| After 2 years – after 1 month | -12.32 | -21.597 | 0.000 | YES |
| After 1 year r- after 6 months | -3.24 | -5.441 | 0.006 | YES |
| After 2 years – after 6 months | -8.26 | -8.299 | 0.001 | YES |
| After 2 years – after 1 year | -5.02 | -8.316 | 0.001 | YES |
| Group II | After 1 month – initial stage | -2.68 | -3.256 | 0.031 | YES |
| After 6 months – initial stage | -3.84 | -4.614 | 0.0099 | YES |
| After 1 year – initial stage | -6.38 | -9.923 | 0.001 | YES |
| After 2 years – initial stage | -8.60 | -17.132 | 0.000 | YES |
| After 6 months – after 1 month | -1.16 | -4.429 | 0.011 | YES |
| After 1 year – after 1 month | -3.70 | -14.981 | 0.000 | YES |
| After 2 years – after 1 month | -5.92 | -8.568 | 0.001 | YES |
| After 1 year r- after 6 months | -2.54 | -6.280 | 0.003 | YES |
| After 2 years – after 6 months | -4.76 | -6.152 | 0.004 | YES |
| After 2 years – after 1 year | -2.22 | -4.635 | 0.0098 | YES |
| Group III | After 1 month – initial stage | -4.26 | -2.729 | 0.052 | NO |
| After 6 months – initial stage | -11.94 | -5.310 | 0.006 | YES |
| After 1 year – initial stage | -17.22 | -7.851 | 0.001 | YES |
| After 2 years – initial stage | -22.56 | -12.812 | 0.000 | YES |
| After 6 months – after 1 month | -7.68 | -3.917 | 0.017 | YES |
| After 1 year – after 1 month | -12.96 | -7.202 | 0.002 | YES |
| After 2 years – after 1 month | -18.30 | -10.850 | 0.000 | YES |
| After 1 year r- after 6 months | -5.28 | -8.355 | 0.001 | YES |
| After 2 years – after 6 months | -10.62 | -13.323 | 0.000 | YES |
| After 2 years – after 1 year | -5.34 | -6.222 | 0.003 | YES |
| Group IV | After 1 month – initial stage | -2.00 | -3.158 | 0.034 | YES |
| After 6 months – initial stage | -5.42 | -8.619 | 0.001 | YES |
| After 1 year – initial stage | -8.02 | -14.465 | 0.000 | YES |
| After 2 years – initial stage | -9.50 | -23.041 | 0.000 | YES |
| After 6 months – after 1 month | -3.42 | -9.435 | 0.001 | YES |
| After 1 year – after 1 month | -6.02 | -6.936 | 0.002 | YES |
| After 2 years – after 1 month | -7.50 | -12.199 | 0.000 | YES |
| After 1 year r- after 6 months | -2.60 | -3.426 | 0.027 | YES |
| After 2 years – after 6 months | -4.08 | -5.402 | 0.006 | YES |
| After 2 years – after 1 year | -1.48 | -2.092 | 0.105 | NO |
