# Supplementary material for: Oral Health Knowledge, Attitude, and Practices among Parents of Pre-school Children in Damascus, Syria: Cross-Sectional Study
Source: Research Square preprint supplement (doi:10.21203/rs.3.rs-8498793/v1), 2026-02-10
Supplement: Supplementary file 2 [file 61b486fbd6cae00d080bd712.docx]

| **Parental Education Level** | Educated | Uneducated |  |  |  |  |  |
| --- | --- | --- | --- | --- | --- | --- | --- |
| **Do You have children aged between 4-6 years old?** | Yes | No |  |  |  |  |  |
| **Child Gender** | Male | Female |  |  |  |  |  |
| **Child Order** | Youngest | Middle Childe | Oldest |  |  |  |  |
| **Daily Brushing Frequency** | 0 time daily | 1 time daily | 2 times daily | 3 times daily |  |  |  |
| **Brushing Duration** | 1 min. | 2 min. | 3 min. | Less than 1 minute |  |  |  |
| **Toothpaste Amount** | Rice-sized | Pea-sized | More | Less |  |  |  |
| **Toothbrush Changing Periods** | 6 months | A year | More | Less |  |  |  |
| **Dental Visit** | Regularly | On Pain | Never |  |  |  |  |
| **Temporary Tooth Treatment** | Important | Not Important |  |  |  |  |  |
| **Handling Orthodontic Problems** | Permanent Waiting | Orthodontist Consulted |  |  |  |  |  |
| **Applying Local Fluoride** | Done | Never |  |  |  |  |  |
| **Sugar Daily Intake** | 0 time a day | 1 time a day | 2 times a day | 3 times a day |  |  |  |
| **Soda Daily Intake** | 0 time per week | 1 time per week | 2 times per week | 3 times per week |  |  |  |
| **Current Caries** | Yes | No |  |  |  |  |  |
| **If Caries Positive** | On Anterior | On Posterior |  |  |  |  |  |
| **Extracted or lost teeth due to Caries** | 0 | 1 | 2 | 3 | 4 | 5 | 6 |
