# Supplementary material for: Oral Health Knowledge, Attitude, and Practices among Parents of Pre-school Children in Damascus, Syria: Cross-Sectional Study
Source: Research Square preprint supplement (doi:10.21203/rs.3.rs-8498793/v1), 2026-02-10
Supplement: Supplementary file 3 [file 6381ed1297e600451c4f1aa3.docx]

Table 1. Mean, maximum, minimum and std. deviation for retention forces.

|  | |  | | | | Group Statistics | | | |
| --- | --- | --- | --- | --- | --- | --- | --- | --- | --- |
|  | Group | | N | Mean | Minimum | | Maximum | Std. Deviation | Std. Error Mean |
| Initial stage | Group I | | 5 | 18.44 | 17.5 | | 19.5 | .754 | .337 |
| Group II | | 5 | 37.32 | 31 | | 45.7 | 5.559 | 2.486 |
| Group III | | 5 | 17.00 | 16 | | 18.7 | 1.058 | .473 |
| Group IV | | 5 | 34.30 | 26.3 | | 45 | 7.900 | 3.533 |
| After 1 month | Group I | | 5 | 16.4400 | 15 | | 19.1 | 1.62265 | .72567 |
| Group II | | 5 | 33.0600 | 27.8 | | 36 | 3.36348 | 1.50419 |
| Group III | | 5 | 14.3200 | 12.9 | | 15.1 | .90664 | .40546 |
| Group IV | | 5 | 31.6800 | 25.5 | | 43.2 | 7.24686 | 3.24089 |
| After 6 months | Group I | | 5 | 13.0200 | 11.4 | | 15.6 | 1.71523 | .76707 |
| Group II | | 5 | 25.3800 | 19.8 | | 30 | 4.65102 | 2.08000 |
| Group III | | 5 | 13.1600 | 11.9 | | 14.5 | 1.15456 | .51633 |
| Group IV | | 5 | 27.6200 | 21 | | 37.9 | 7.46304 | 3.33757 |
| After 1 year | Group I | | 5 | 10.4200 | 9.8 | | 11.9 | .85557 | .38262 |
| Group II | | 5 | 20.1000 | 13.8 | | 26.4 | 4.89898 | 2.19089 |
| Group III | | 5 | 10.6200 | 10 | | 11.3 | .62610 | .28000 |
| Group IV | | 5 | 24.3800 | 18.8 | | 34 | 6.46080 | 2.88936 |
| After 2 years | Group I | | 5 | 8.9400 | 7.8 | | 9.9 | .92898 | .41545 |
| Group II | | 5 | 14.7600 | 10.8 | | 19 | 4.02405 | 1.79961 |
| Group III | | 5 | 8.4000 | 7 | | 9.5 | 1.02225 | .45717 |
| Group IV | | 5 | 19.3600 | 14 | | 29 | 6.06201 | 2.71101 |
