# Supplementary material for: Oral Health Knowledge, Attitude, and Practices among Parents of Pre-school Children in Damascus, Syria: Cross-Sectional Study
Source: Research Square preprint supplement (doi:10.21203/rs.3.rs-8498793/v1), 2026-02-10
Supplement: Supplementary file 4 [file 7101d762fa7b1df84300075b.docx]

Table 10: The relationship between child order and dental hygiene practices.

|  | | Crosstab | | | | | | | | Chi-Square Tests | | | |
| --- | --- | --- | --- | --- | --- | --- | --- | --- | --- | --- | --- | --- | --- |
|  |  | Child Order | | | | | | Total | | Exact Sig. (2-sided) | | | |
|  | Oldest | | Middle Child | | Youngest Child | | Pearson Chi-Square | | Likelihood Ratio | Fisher's Exact Test |
|  | N | % | N | % | N | % | N | % |
| **Daily brushing frequency** | 0 | 40 | 1.5% | 20 | .7% | 70 | 2.6% | 130 | 4.8% | .811 | | .848 | .718 |
| 1 | 730 | 27.0% | 260 | 9.6% | 690 | 25.6% | 1680 | 62.2% |  | | | |
| 2 | 330 | 12.2% | 100 | 3.7% | 420 | 15.6% | 850 | 31.5% |
| 3 | 20 | .7% | 10 | .4% | 10 | .4% | 40 | 1.5% |
| Total | | 1120 | 41.5% | 390 | 14.4% | 1190 | 44.1% | 2700 | 100.0% |
| **Brushing Duration** | 1 min. | 470 | 17.4% | 130 | 4.8% | 430 | 15.9% | 1030 | 38.1% | .579 | | .566 | .572 |
| 2min. | 380 | 14.1% | 160 | 5.9% | 430 | 15.9% | 970 | 35.9% |  | | | |
| 3 min. | 170 | 6.3% | 30 | 1.1% | 160 | 5.9% | 360 | 13.3% |
| Less | 100 | 3.7% | 70 | 2.6% | 170 | 6.3% | 340 | 12.6% |
| Total | | 1120 | 41.5% | 390 | 14.4% | 1190 | 44.1% | 2700 | 100.0% |
| **Toothbrush changing periods** | 6 months | 610 | 22.6% | 230 | 8.5% | 700 | 25.9% | 1540 | 57.0% | .261 | | .175 | .293 |
| A year | 200 | 7.4% | 50 | 1.9% | 210 | 7.8% | 460 | 17.0% |  | | | |
| More | 40 | 1.5% | 0 | .0% | 90 | 3.3% | 130 | 4.8% |
| Less | 270 | 10.0% | 110 | 4.1% | 190 | 7.0% | 570 | 21.1% |
| Total | | 1120 | 41.5% | 390 | 14.4% | 1190 | 4.1% | 2700 | 100.0% |
| **Toothpaste amount** | Rice | 200 | 7.4% | 40 | 1.5% | 170 | 6.3% | 410 | 15.2% | .225 | .177 | | .208 |
| Peas | 790 | 29.3% | 310 | 11.5% | 950 | 35.2% | 2050 | 75.9% |  | | | |
| More | 100 | 3.7% | 40 | 1.5% | 30 | 1.1% | 170 | 6.3% |
| Less | 30 | 1.1% | 00 | .0% | 40 | 1.5% | 70 | 2.6% |
| Total | | 1120 | 41.5% | 390 | 14.4% | 1190 | 44.1% | 2700 | 100.0% |
| **Dental Visit** | Regularly | 150 | 5.6% | 60 | 2.2% | 150 | 5.6% | 360 | 13.3% | .061 | | 0.061 | 0.061 |
| On pain | 600 | 22.2% | 280 | 10.4% | 800 | 29.6% | 1680 | 62.2% |  | | | |
|  | Never | 370 | 13.7% | 50 | 1.9% | 240 | 8.9% | 660 | 24.4% |
| Total | | 1120 | 41.5% | 390 | 14.4% | 1190 | 44.1% | 2700 | 100.0% |
| **Temporary teeth treatment** | Important | 1030 | 38.1% | 340 | 12.6% | 1070 | 39.6% | 2440 | 90.4% | .695 | | .695 | .614 |
| Not important | 90 | 3.3% | 50 | 1.9% | 120 | 4.4% | 260 | 9.6% |  | | | |
| Total | | 1120 | 41.5% | 390 | 14.4% | 1190 | 44.1% | 2700 | 100.0% |
| **Applies local fluoride** | Done | 140 | 5.2% | 40 | 1.5% | 80 | 3.0% | 260 | 9.6% | .328 | | .316 | .327 |
| Never | 980 | 36.3% | 350 | 13.0% | 1110 | 41.1% | 2440 | 90.4% |  | | | |
| Total | | 1120 | 41.5% | 390 | 14.4% | 1190 | 44.1% | 2700 | 100.0% |
| **Handling Orthodontic Problems** | Permanent waiting | 480 | 17.8% | 170 | 6.3% | 590 | 21.9% | 1240 | 45.9% | .585 | | .577 | .585 |
| orthodontist consulted | 640 | 23.7% | 220 | 8.1% | 600 | 22.2% | 1460 | 54.1% |
| Total | | 1120 | 41.5% | 390 | 14.4% | 1190 | 44.1% | 2700 | 100.0% |
| **Sugar daily intake** | 0 | 20 | .7% | 0 | .0% | 10 | .4% | 30 | 1.1% | .853 | | .840 | .892 |
| 1 | 310 | 11.5% | 90 | 3.3% | 300 | 11.1% | 700 | 25.9% |  | | | |
| 2 | 530 | 19.6% | 230 | 8.5% | 580 | 21.5% | 1340 | 49.6% |
| 3 | 260 | 9.6% | 70 | 2.6% | 300 | 11.1% | 630 | 23.3% |
| Total | | 1120 | 41.5% | 390 | 14.4% | 1190 | 44.1% | 2700 | 100.0% |
| **Soda weekly intake** | 0 | 790 | 29.3% | 290 | 10.7% | 780 | 28.9% | 1860 | 68.9% | .924 | | .939 | .889 |
| 1 | 270 | 10.0% | 80 | 3.0% | 330 | 12.2% | 680 | 25.2% |  | | | |
| 2 | 50 | 1.9% | 10 | .4% | 60 | 2.2% | 120 | 4.4% |
| 3 | 10 | .4% | 10 | .4% | 20 | .7% | 40 | 1.5% |
| Total | | 1120 | 41.5% | 390 | 14.4% | 1190 | 44.1% | 2700 | 100.0% |
| **Extracted or lost teeth** | 0 | 930 | 34.4% | 320 | 11.9% | 990 | 36.7% | 2240 | 83.0% | .951 | | .954 | .924 |
| 1 | 70 | 2.6% | 20 | .7% | 70 | 2.6% | 160 | 5.9% |  | | | |
| 2 | 50 | 1.9% | 20 | .7% | 520 | 1.9% | 120 | 4.4% |
| 3 | 50 | 1.9% | 10 | .4% | 20 | .7% | 80 | 3.0% |
|  | 4 | 20 | .7% | 20 | .7% | 50 | 1.9% | 90 | 3.3% |
|  | 6 | 0 | .0% | 0 | .0% | 10 | .4% | 10 | .4% |
| Total | | 1120 | 41.5% | 390 | 14.4% | 1190 | 44.1% | 2700 | 100.0% |
| **Current Caries** | Yes | 480 | 17.8% | 180 | 6.7% | 570 | 21.1% | 1230 | 45.6% | .760 | | .760 | .770 |
| No | 640 | 23.7% | 210 | 7.8% | 620 | 23.0% | 1470 | 54.4% |  | | | |
| Total | | 1120 | 41.5% | 390 | 14.4% | 1190 | 44.1% | 2700 | 100.0% |
