# Supplementary material for: Oral Health Knowledge, Attitude, and Practices among Parents of Pre-school Children in Damascus, Syria: Cross-Sectional Study
Source: Research Square preprint supplement (doi:10.21203/rs.3.rs-8498793/v1), 2026-02-10
Supplement: Supplementary file 5 [file 75a2f03dfd34e3d3e2525127.docx]

Table 2. test.

| Reliability Statistics | |
| --- | --- |
| Cronbach's Alpha | N of Items |
| .975 | 5 |
