# Supplementary material for: Oral Health Knowledge, Attitude, and Practices among Parents of Pre-school Children in Damascus, Syria: Cross-Sectional Study
Source: Research Square preprint supplement (doi:10.21203/rs.3.rs-8498793/v1), 2026-02-10
Supplement: Supplementary file 6 [file 79c8ac87b0167464b49d2fd6.docx]

Table 3. Kolmogorov–Smirnov test.

| Tests of Normality | | | | | | | |
| --- | --- | --- | --- | --- | --- | --- | --- |
|  | Group | Kolmogorov-Smirnova | | | Shapiro-Wilk | | |
|  | Statistic | Df | Sig. | Statistic | Df | Sig. |
| Initial stage | Group I | .174 | 5 | .200* | .988 | 5 | .972 |
| Group II | .244 | 5 | .200* | .945 | 5 | .701 |
| Group III | .282 | 5 | .200* | .882 | 5 | .318 |
| Group IV | .229 | 5 | .200* | .917 | 5 | .512 |
| After 1 month | Group I | .261 | 5 | .200* | .877 | 5 | .295 |
| Group II | .266 | 5 | .200* | .882 | 5 | .320 |
| Group III | .205 | 5 | .200* | .883 | 5 | .321 |
| Group IV | .197 | 5 | .200* | .883 | 5 | .325 |
| After 6 months | Group I | .284 | 5 | .200* | .898 | 5 | .397 |
| Group II | .276 | 5 | .200* | .857 | 5 | .219 |
| Group III | .248 | 5 | .200* | .877 | 5 | .296 |
| Group IV | .247 | 5 | .200* | .878 | 5 | .299 |
| After 1 year | Group I | .309 | 5 | .133 | .761 | 5 | .037 |
| Group II | .141 | 5 | .200* | .990 | 5 | .981 |
| Group III | .239 | 5 | .200* | .849 | 5 | .191 |
| Group IV | .289 | 5 | .200* | .871 | 5 | .269 |
| After 2 years | Group I | .290 | 5 | .197 | .871 | 5 | .269 |
| Group II | .248 | 5 | .200* | .830 | 5 | .139 |
| Group III | .211 | 5 | .200* | .934 | 5 | .620 |
| Group IV | .193 | 5 | .200* | .894 | 5 | .380 |
| *. This is a lower bound of the true significance. | | | | | | | |
| a. Lilliefors Significance Correction | | | | | | | |
