# Supplementary material for: Oral Health Knowledge, Attitude, and Practices among Parents of Pre-school Children in Damascus, Syria: Cross-Sectional Study
Source: Research Square preprint supplement (doi:10.21203/rs.3.rs-8498793/v1), 2026-02-10
Supplement: Supplementary file 7 [file a5b0eb4807803fdbe58db622.docx]

Table 4. One-Way ANOVA test to study the significance of the differences in the amount of change in the values ​​of the retention force (in Newtons) between the four groups studied in the research sample, according to the number of insertion and removal cycles studied.

|  | Group | N | Mean | Std. Deviation | Minimum | Maximum | F Value | P Value | Sig. |
| --- | --- | --- | --- | --- | --- | --- | --- | --- | --- |
| Initial stage | I | 5 | 18.44 | .754 | 17.5 | 19.5 | 23.356 | 0.000 | Yes |
| II | 5 | 37.32 | 5.559 | 31 | 45.7 |
| III | 5 | 17.00 | 1.058 | 16 | 18.7 |
| IV | 5 | 34.30 | 7.900 | 26.3 | 45 |
| After 1 month | I | 5 | 16.4400 | 1.62265 | 15 | 19.1 | 28.918 | 0.000 | Yes |
| II | 5 | 33.0600 | 3.36348 | 27.8 | 36 |
| III | 5 | 14.3200 | .90664 | 12.9 | 15.1 |
| IV | 5 | 31.6800 | 7.24686 | 25.5 | 43.2 |
| After 6 months | I | 5 | 13.0200 | 1.71523 | 11.4 | 15.6 | 14.897 | 0.000 | Yes |
| II | 5 | 25.3800 | 4.65102 | 19.8 | 30 |
| III | 5 | 13.1600 | 1.15456 | 11.9 | 14.5 |
| IV | 5 | 27.6200 | 7.46304 | 21 | 37.9 |
| After 1 year | I | 5 | 10.4200 | .85557 | 9.8 | 11.9 | 14.610 | 0.000 | Yes |
| II | 5 | 20.1000 | 4.89898 | 13.8 | 26.4 |
| III | 5 | 10.6200 | .62610 | 10 | 11.3 |
| IV | 5 | 24.3800 | 6.46080 | 18.8 | 34 |
| After 2 years | I | 5 | 8.9400 | .92898 | 7.8 | 9.9 | 9.860 | 0.001 | Yes |
| II | 5 | 14.7600 | 4.02405 | 10.8 | 19 |
| III | 5 | 8.4000 | 1.02225 | 7 | 9.5 |
| IV | 5 | 19.3600 | 6.06201 | 14 | 29 |
