# Supplementary material for: Oral Health Knowledge, Attitude, and Practices among Parents of Pre-school Children in Damascus, Syria: Cross-Sectional Study
Source: Research Square preprint supplement (doi:10.21203/rs.3.rs-8498793/v1), 2026-02-10
Supplement: Supplementary file 8 [file af181bc9bad07527d9d77ee1.docx]

Table 9: The relationship between child gender and dental hygiene practices.

|  | |  | | | **Crosstab** | | | | **Chi-Square Tests** | | | |
| --- | --- | --- | --- | --- | --- | --- | --- | --- | --- | --- | --- | --- |
|  |  | Gender | | | | | Total | | Exact Sig. (2-sided) | | | |
|  | Male | | Female | | | Pearson Chi-Square | | Likelihood Ratio | Fisher's Exact Test |
|  | N | % | N | | % | N | % |
| **Toothbrush changing periods** | 6 months | 750 | 27.8% | 790 | | 29.3% | 1540 | 57.0% | .052 | | .053 | .053 |
| A year | 310 | 11.5% | 150 | | 5.6% | 460 | 17.0% |  | | | |
| More | 40 | 1.5% | 90 | | 3.3% | 130 | 4.8% |
| Less | 270 | 10.0% | 300 | | 11.1% | 570 | 21.1% |
| Total | | 1370 | 50.7% | 1330 | | 49.3% | 2700 | 100.0% |
| **Dental Visit** | Regularly | 190 | 7.0% | 170 | | 6.3% | 360 | 13.1% | .311 | | .311 | .331 |
| On pain | 900 | 33.3% | 780 | | 28.9% | 1680 | 62.2% |  | | | |
|  | Never | 280 | 10.4% | 380 | | 14.1% | 660 | 24.4% |
| Total | | 1370 | 50.7% | 1330 | | 49.3% | 2700 | 100.0% |
| **Temporary teeth treatment** | Important | 1280 | 47.4% | 1160 | | 43.0% | 2440 | 90.4% | .100 | .100 | | .100 |
| Not important | 90 | 3.3% | 170 | | 6.3% | 260 | 9.6% |  | | | |
| Total | | 1370 | 50.7% | 1330 | | 49.3% | 2700 | 100.0% |
| **Applies local fluoride** | Done | 90 | 3.3% | 170 | | 6.3% | 260 | 9.6% | .100 | .100 | | .100 |
| Never | 1280 | 47.4% | 1160 | | 43.0% | 2440 | 90.4% |  | | | |
| Total | | 1370 | 50.7% | 1330 | | 49.3% | 1700 | 100.0% |
| **Handling Orthodontic Problems** | Permanent waiting | 620 | 23.0% | 620 | | 23.0% | 1240 | 45.9% | .903 | | .903 | .903 |
| orthodontist consulted | 750 | 27.8% | 710 | | 26.3% | 1460 | 54.1% |
| Total | | 1370 | 50.7% | 1330 | | 49.3% | 2700 | 100.0% |
| **Sugar daily intake** | 0 | 10 | .4% | 20 | | .7% | 30 | 1.1% | .077 | | .107 | .067 |
| 1 | 270 | 10.0% | 430 | | 15.9% | 700 | 25.9% |  | | | |
| 2 | 720 | 26.7% | 620 | | 23.0% | 1340 | 49.6% |
| 3 | 370 | 13.7% | 260 | | 9.6% | 630 | 23.3% |
| Total | | 1370 | 50.7% | 1330 | | 49.3% | 2700 | 100.0% |
| **Soda weekly intake** | 0 | 970 | 35.9% | 890 | | 33.0% | 1860 | 68.9% | .914 | | .914 | .899 |
| 1 | 320 | 11.9% | 360 | | 13.3% | 680 | 25.5% |  | | | |
| 2 | 60 | 2.2% | 60 | | 2.2% | 120 | 4.4% |
| 3 | 20 | .7% | 20 | | .7% | 40 | 105% |
| Total | | 1370 | 50.7% | 1330 | | 49.3% | 2700 | 100.0% |
| **Extracted or lost teeth** | 0 | 1130 | 41.9% | 1110 | | 41.1% | 2240 | 83.0% | .898 | | .898 | .898 |
| 1 | 90 | 3.3% | 70 | | 2.6% | 160 | 5.9% |  | | | |
| 2 | 50 | 1.9% | 70 | | 2.6% | 120 | 4.4% |
| 3 | 50 | 1.9% | 30 | | 1.1% | 80 | 3.0% |
|  | 4 | 40 | 1.5% | 50 | | 1.9% | 90 | 3.3% |
|  | 6 | 10 | .4% | .0 | | .0% | 10 | .4% |
| Total | | 1370 | 50.7% | 1330 | | 49.3% | 2700 | 100.0% |
| **Current Caries** | Yes | 670 | 24.8% | 560 | | 20.7% | 1230 | 45.6% | .274 | | .274 | .274 |
| No | 700 | 25.9% | 770 | | 28.5% | 1470 | 54.4% |  | | | |
| Total | | 1370 | 50.7% | 1330 | | 49.3% | 2700 | 100.0% |
