# Supplementary material for: Oral Health Knowledge, Attitude, and Practices among Parents of Pre-school Children in Damascus, Syria: Cross-Sectional Study
Source: Research Square preprint supplement (doi:10.21203/rs.3.rs-8498793/v1), 2026-02-10
Supplement: Supplementary file 9 [file e5f9411bf7111a6b3a68af4a.docx]

Table 7. A One-Way ANOVA test was conducted to study the significance of the differences in the values of retention force change percentage between the four groups studied in the research sample, according to the number of insertion and removal cycles studied.

|  | Group | N | Mean | Std. Deviation | Minimum | Maximum | F Value | P Value | Sig. |
| --- | --- | --- | --- | --- | --- | --- | --- | --- | --- |
| After 1 month | IV | 5 | -7.31 | 5.79 | -15.3 | -1.1 | 0.946 | 0.442 | NO |
| III | 5 | -15.33 | 9.41 | -31.0 | -5.6 |  |  |
| II | 5 | -10.80 | 6.98 | -22.8 | -5.5 |
| I | 5 | -10.86 | 7.56 | -20.2 | -2.1 |
| After 6 months | IV | 5 | -19.81 | 6.32 | -29.9 | -13.4 | 2.020 | 0.152 | NO |
| III | 5 | -22.23 | 9.42 | -36.4 | -13.8 |  |  |  |
| II | 5 | -31.62 | 11.29 | -44.9 | -18.6 |
| I | 5 | -29.47 | 7.78 | -37.7 | -20.0 |
| After 1 year | IV | 5 | -29.03 | 6.37 | -40.1 | -24.4 | 5.003 | 0.012 | Yes |
| III | 5 | -37.27 | 6.16 | -46.5 | -30.0 |  |  |
| II | 5 | -46.15 | 11.00 | -55.5 | -30.5 |
| I | 5 | -43.39 | 5.55 | -48.7 | -34.3 |
| After 2 years | IV | 5 | -44.20 | 5.16 | -49.2 | -35.6 | 6.474 | 0.004 | Yes |
| III | 5 | -50.55 | 5.74 | -57.6 | -41.9 |  |  |
| II | 5 | -60.66 | 7.78 | -70.9 | -50.3 |
| I | 5 | -51.52 | 4.69 | -56.9 | -45.7 |
