# Supplementary material for: Oral Health Knowledge, Attitude, and Practices among Parents of Pre-school Children in Damascus, Syria: Cross-Sectional Study
Source: Research Square preprint supplement (doi:10.21203/rs.3.rs-8498793/v1), 2026-02-10
Supplement: Supplementary file 10 [file e62455cbc984a0d7b2e5bb5a.docx]

Table 5. Bonferroni test to compare the values ​​of the retention force (in Newtons) between the groups in the research sample according to the number of insertion and removal cycles studied

|  | Group A | Group B | Mean Difference A-B | Std. Error for mean difference | P Value | Sig. |
| --- | --- | --- | --- | --- | --- | --- |
| Initial stage | IV | III | 17.30 | 3.08 | 0.000 | YES |
| II | -3.02 | 3.08 | 1.000 | NO |
| I | 15.86 | 3.08 | 0.001 | YES |
| III | II | -20.32 | 3.08 | 0.000 | YES |
| I | -1.44 | 3.08 | 1.000 | NO |
| II | I | 18.88 | 3.08 | 0.000 | YES |
| After 1 month | IV | III | 17.36 | 2.59 | 0.000 | YES |
| II | -1.38 | 2.59 | 1.000 | NO |
| I | 15.24 | 2.59 | 0.000 | YES |
| III | II | -18.74 | 2.59 | 0.000 | YES |
| I | -2.12 | 2.59 | 1.000 | NO |
| II | I | 16.62 | 2.59 | 0.000 | YES |
| After 6 months | IV | III | 14.46 | 2.86 | 0.001 | YES |
| II | 2.24 | 2.86 | 1.000 | NO |
| I | 14.60 | 2.86 | 0.001 | YES |
| III | II | -12.22 | 2.86 | 0.003 | YES |
| I | 0.14 | 2.86 | 1.000 | NO |
| II | I | 12.36 | 2.86 | 0.003 | YES |
| After 1 year | IV | III | 13.76 | 2.59 | 0.000 | YES |
| II | 4.28 | 2.59 | 0.704 | NO |
| I | 13.96 | 2.59 | 0.000 | YES |
| III | II | -9.48 | 2.59 | 0.013 | YES |
| I | 0.20 | 2.59 | 1.000 | NO |
| II | I | 9.68 | 2.59 | 0.011 | YES |
| After 2 years | IV | III | 10.96 | 2.34 | 0.002 | YES |
| II | 4.60 | 2.34 | 0.403 | NO |
| I | 10.42 | 2.34 | 0.002 | YES |
| III | II | -6.36 | 2.34 | 0.092 | NO |
| I | -0.54 | 2.34 | 1.000 | NO |
| II | I | 5.82 | 2.34 | 0.146 | NO |
