# Supplementary material for: Oral Health Knowledge, Attitude, and Practices among Parents of Pre-school Children in Damascus, Syria: Cross-Sectional Study
Source: Research Square preprint supplement (doi:10.21203/rs.3.rs-8498793/v1), 2026-02-10
Supplement: Supplementary file 11 [file efbe3e057ea9170655b98aa4.docx]

Table 8. Bonferroni test was conducted to know if there were pair-wise significant differences in the retention force change percentage between the groups in the research sample according to the number of insertion and removal cycles studied.

|  | Group A | Group B | Mean Difference A-B | Std. Error for the mean difference | P Value | Sig. |
| --- | --- | --- | --- | --- | --- | --- |
| After 1 year | IV | III | 8.24 | 4.80 | 0.631 | No |
| II | 17.13 | 4.80 | 0.015 | Yes |
| I | 14.36 | 4.80 | 0.052 | No |
| III | II | 8.88 | 4.80 | 0.497 | No |
| I | 6.12 | 4.80 | 1.000 | No |
| II | I | -2.76 | 4.80 | 1.000 | No |
| After 2 years | IV | III | 6.36 | 3.77 | 0.667 | No |
| II | 16.46 | 3.77 | 0.003 | Yes |
| I | 7.32 | 3.77 | 0.419 | No |
| III | II | 10.11 | 3.77 | 0.098 | No |
| I | 0.96 | 3.77 | 1.000 | No |
| II | I | -9.14 | 3.77 | 0.165 | No |
